# Supplementary material for: An efficient ratiometric fluorescent probe based on dual-emission fluorescent silica nanoparticles for visual determination of Hg2+
Source: Royal Society of Chemistry journal article supplement (doi:10.1039/c4ay02905d), 2015-01-01
Supplement: c4ay02905d1.pdf [file c4ay02905d1.pdf]

## Supplementary Information

### Efficient ratiometric fluorescence probe based on dual-emission fluorescent silica nanoparticle for visual determination of Hg<sup>2+</sup>

Jing Wang,<sup>a</sup> Meng Ma,<sup>b</sup> Rongbin Huang,<sup>a</sup> Aimin Chen<sup>\*a</sup> and Jun Hu<sup>\*a</sup>

*a* College of Chemical Engineering, Zhejiang University of Technology, Hangzhou, 310014, PR China. E-mail: amchen@zjut.edu.cn; hjzjut@zjut.edu.cn

*b* College of Materials Science and Engineering, Zhejiang University of Technology, Hangzhou, 310014, PR China.

#### Experimental Details

##### Reagents

All the starting materials of the FITC-silica and dual-emission silica nanoparticles synthesis were used without further purification. CdCl<sub>2</sub>·2.5H<sub>2</sub>O (99.0%), NaBH<sub>4</sub> (96.0%), tellurium powder (99.9%) were purchased from Sinopharm Chemical Reagent Co. Ltd. (Shanghai, China). Tetraethoxysilane (TEOS), fluorescein isothiocyanate isomer I (FITC, ≥90%), N-Acetyl-L-cysteine (NAC), 3-aminopropyltriethoxysilane (APTES, 99%), poly (allylamine) hydrochloride (PAH, molecular weight (MW)≈56000 g mol<sup>-1</sup>) and poly(sodium 4-styrene-sulfonate) (PSS, MW≈70000 g mol<sup>-1</sup>) were obtained from Sigma-Aldrich Chemicals Co. Mercury nitrate (Hg(NO<sub>3</sub>)<sub>2</sub>) and other common solvents and salts were obtained from Aladdin Reagent Co. Ltd. For all aqueous solutions, high-purity ultrapure water from a Millipore (18.2 MΩ·cm) system was used throughout the experiments.

##### Experimental measurements

The optical absorption spectra were acquired on the Nicolet Evolution 300 UV-Vis spectrometer (Thermo, USA) coupled with a 1.00 cm quartz cell. Fluorescence spectra and fluorescence lifetime study were performed on an Edinburgh FLS920 spectrometer (Edinburgh Instruments Ltd, UK) with an integrating-sphere attachment under excitation of 365 nm. Measurements of Zeta potential in aqueous solution were

acquired on a Zetasizer Nano-ZS90 (Malvern Instruments Ltd, UK). The FL QY of the as-prepared FITC-doped silica nanoparticles (85.6%) and CdTe/CdS QDs (33.4%) were determined through comparison using a Rhodamine G6 standard organic dye. Transmission electron microscopy (TEM) images were acquired using a Tecnai G<sup>2</sup> F30 S-Twin transmission electron microscope (FEI, Holland) operating at an acceleration voltage of 200 kV. The concentration analysis of Hg<sup>2+</sup> in real water samples were carried out on an AFS-830 cold-vapour atomic fluorescence spectrophotometer (CV-AFS).

### ***Synthesis of FITC-doped silica nanoparticles***

Fluorescein isothiocyanate (39 mg, 0.10 mmol) was mixed with APTES (23  $\mu$ L, 0.10 mmol) in 100 mL of absolute ethanol, and was stirred at 42 °C for 24 h to yield the FITC-silane precursor. The FITC-doped silica nanoparticles were prepared following a modified protocol from the classic Stöber method.<sup>1</sup> The FITC-silane precursor solution (5 mL) was mixed with TEOS (2.8 mL), and the mixture was added to absolute ethanol (34 mL) followed by NH<sub>3</sub>·H<sub>2</sub>O (25%, 2.8 mL). The reaction was allowed to proceed at room temperature for at least 8 h with vigorous stirring to yield a bright yellow colloidal solution. The resultant product were collected by centrifugation and washed three times with ethanol.

### ***Synthesis of dual-emission silica nanoparticles (ratiometric fluorescence probe)***

The NAC-capped CdTe/CdS QDs were prepared according to the previous report with a reaction time of 55 min at 200 °C.<sup>2</sup> The self-assembled, three-layer film was formed by incubating sequentially a FITC-doped silica nanoparticle dispersion (0.5 mL, 5 mg mL<sup>-1</sup>) with PAH, PSS and PAH solutions (1 mL, 1 mg mL<sup>-1</sup> in 0.5 mol L<sup>-1</sup> NaCl) for 30 min for each polyelectrolyte layer. Before incubation in the next solution, the resulting particles underwent centrifugation three times with ultrapure water to remove excess polyelectrolyte. The dual-emission silica nanoparticles were prepared by mixing a 500  $\mu$ L dispersion of the microspheres and a 1.0 mL dispersion of the CdTe/CdS QDs (5 mg mL<sup>-1</sup>). After absorption for 2 h, unbound QDs were removed by successive centrifugation and washing with water several times. The obtained dual-emission silica nanoparticles were dispersed in 1 mL of ultrapure water and stored at 4 °C.

### ***Ratiometric fluorescence assay for $\text{Hg}^{2+}$***

Mercury nitrate ( $\text{Hg}(\text{NO}_3)_2$ ) aqueous solution was used for the determination of  $\text{Hg}^{2+}$ . To a 2 mL calibrated test tube 100  $\mu\text{L}$  the ratiometric probe solution ( $5 \text{ mg mL}^{-1}$ ) and certain amounts of  $\text{Hg}^{2+}$  were sequentially added. The mixture was then diluted to volume with 0.01 M phosphate buffer solution (PBS, pH 7.4) and mixed thoroughly. Two minutes later, the mixture was transferred to a 3 mL cuvette and the fluorescence intensity of solution was recorded with the excitation wavelength of 365 nm.

### ***Detection of $\text{Hg}^{2+}$ in real water samples***

The lake water sample was obtained from West Lake and filtered twice using a 0.02  $\mu\text{m}$  membrane to remove the solid suspensions. The tap water was obtained from the lab. Water samples with various concentrations of  $\text{Hg}^{2+}$  were added to our sensing system, and then the fluorescence spectra were collected.

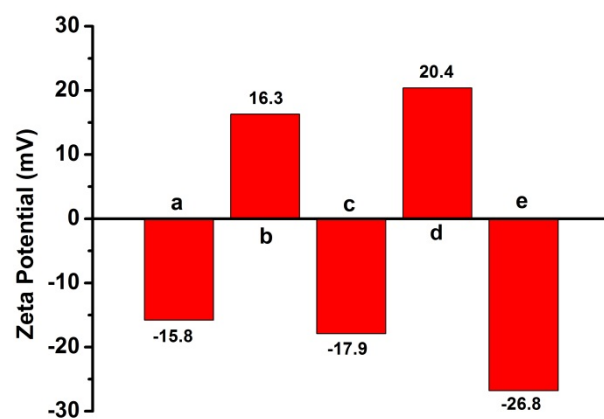

**Fig. S1** Zeta potential of FITC-SiO<sub>2</sub> (a), FITC-SiO<sub>2</sub>/PAH (b), FITC-SiO<sub>2</sub>/PAH/PSS (c), FITC-SiO<sub>2</sub>/PAH/PSS/PAH (d), and CdTe/CdS QDs (e).

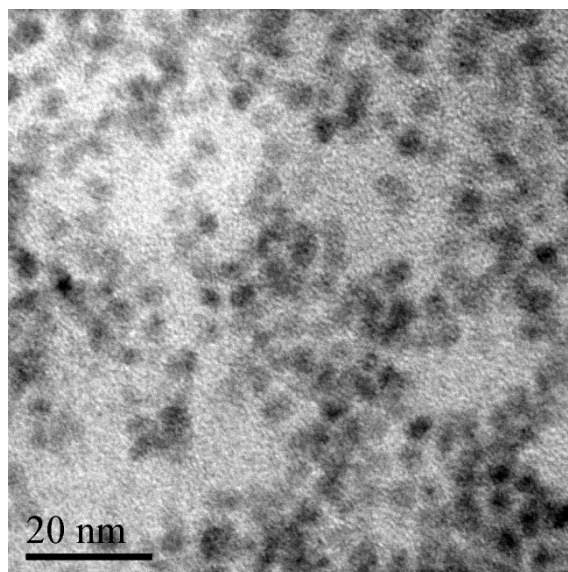

**Fig. S2** TEM of NAC-capped CdTe/CdS QDs.

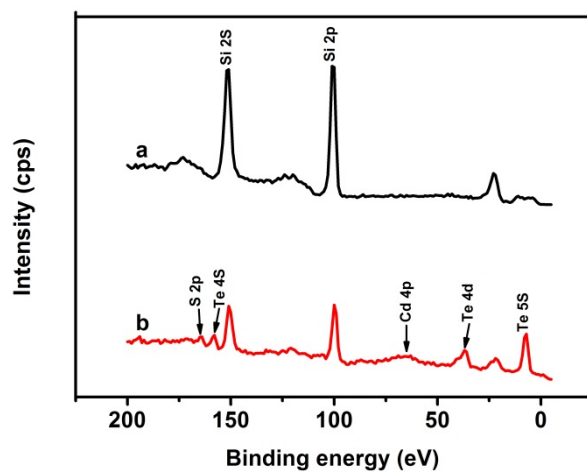

**Fig. S3** XPS spectra from 200 to 0 eV of FITC-doped silica nanoparticles (curve a) and dual-emission silica nanoparticles (curve b).

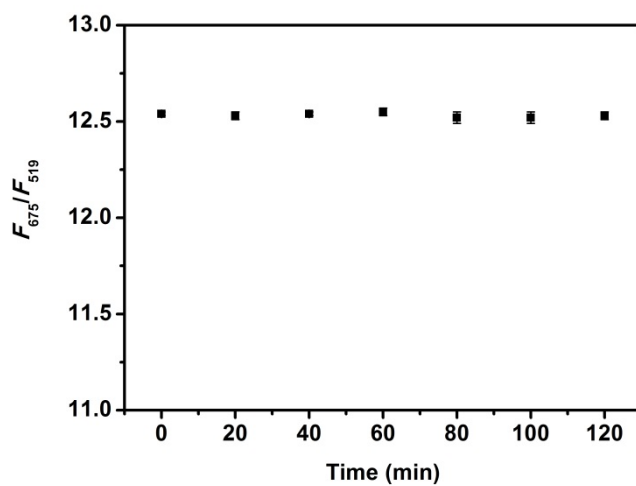

**Fig. S4** Photostability of the fluorescence intensity ratio ( $F_{675}/F_{519}$ ) of the ratiometric fluorescence probe.  $F_{675}$  and  $F_{519}$  are the fluorescence intensity of the ratiometric probe at the emission wavelength of 675 and 519 nm, respectively.

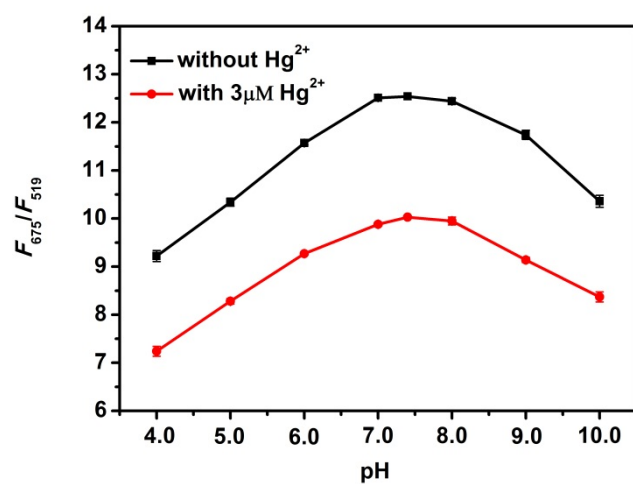

**Fig. S5** The pH dependent response of the ratiometric fluorescence probe in the absence and presence of  $Hg^{2+}$  ( $3\mu M$ ).

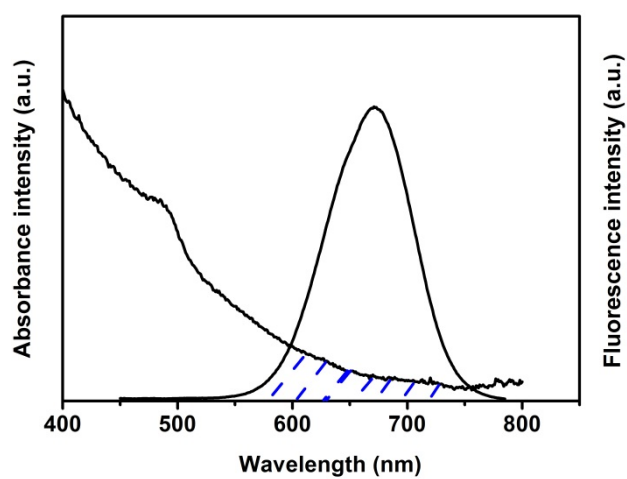

**Fig. S6** Absorption spectrum of FITC-doped silica nanoparticle (left) and emission spectrum of QDs (right), excited at 365 nm.

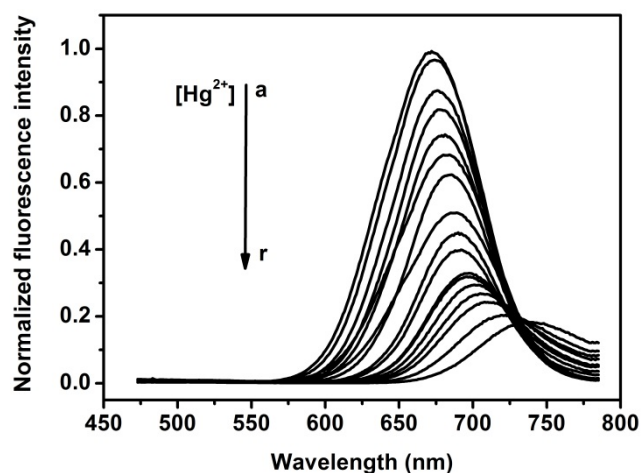

**Fig. S7** The corresponding fluorescence spectra ( $\lambda_{\text{ex}} = 365 \text{ nm}$ ) of the pure red NAC-capped CdTe/CdS QDs upon the exposure to different concentrations of  $\text{Hg}^{2+}$ . The concentration of  $\text{Hg}^{2+}$  from the top to the bottom (a-r): 0, 0.5, 1, 2, 3, 4, 5, 6, 9, 12, 15, 18, 21, 24, 27, 30, 36, 42  $\mu\text{M}$ , respectively. The final concentration of the CdTe/CdS QDs was  $1.0 \times 10^{-7} \text{ mol L}^{-1}$ .

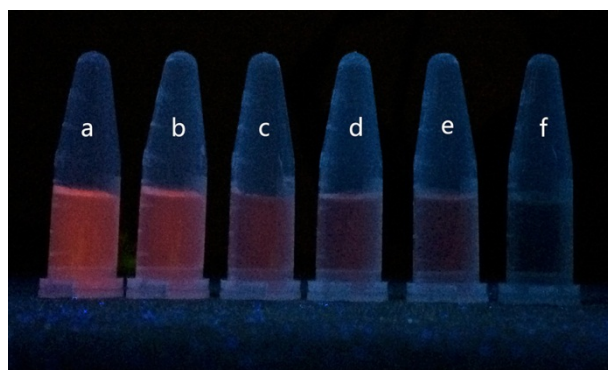

**Fig. S8** The fluorescence photos were taken under a UV lamp at excitation wavelength of 365 nm. The concentrations of  $\text{Hg}^{2+}$  from left to right (a-f) are 0, 2, 4, 9, 15, 21  $\mu\text{M}$ , respectively. The final concentration of the CdTe/CdS QDs was  $1.0 \times 10^{-7} \text{ mol L}^{-1}$ .

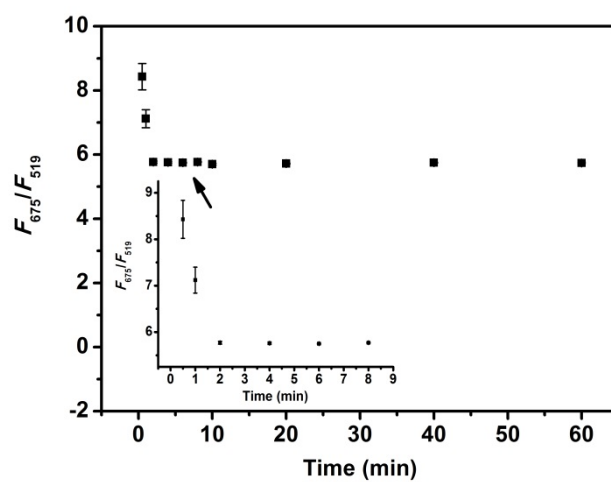

**Fig. S9** Time-dependent fluorescence intensity ratio ( $F_{675}/F_{519}$ ) of the ratiometric fluorescence probe to  $\text{Hg}^{2+}$  (9  $\mu\text{M}$ ).

## Reference

1. W. Stöber, A. Fink and E. Bohn, *J. Colloid Interf. Sci.*, 1968, **26**, 62-69.
2. D. Zhao, Z. He, W. H. Chan and M. M. F. Choi, *J. Phys. Chem. C*, 2009, **113**, 1293-1300.
